# Supplementary material
Source: publisher figshare collection journal article supplement (https://sage.figshare.com/ndownloader/files/12388703)
Supplement: Supplementary file 1 [file 12388703]

Supplementary Figure 1: Baseline demographics, co-morbidities and surgical factors in the sepsis and no sepsis cohorts following propensity score matching.

|  |  | Sepsis | | | No Sepsis | | | Univariate Regression |  |
| --- | --- | --- | --- | --- | --- | --- | --- | --- | --- |
|  |  | num | denom | % | num | denom | % | OR (95% CI) | p-value |
|  | **Age** |  |  |  |  |  |  |  |  |
|  | Mean (SD) | 67.91 |  | 13.3 | 67.81 |  | 12.7 |  | 0.8856 |
|  | <50 | 37 | 410 | 9.0 | 184 | 2050 | 9.0 | 1.00 (0.66 - 1.51) |  |
|  | 50-64 | 103 | 410 | 25.1 | 512 | 2050 | 25.0 | Reference |  |
|  | 65-79 | 186 | 410 | 45.4 | 950 | 2050 | 46.3 | 0.97 (0.75 - 1.27) |  |
|  | >=80 | 84 | 410 | 20.5 | 404 | 2050 | 19.7 | 1.03 (0.75 - 1.42) |  |
|  | **Demographics** |  |  |  |  |  |  |  |  |
|  | Male | 273 | 410 | 66.6 | 1325 | 2046 | 64.8 | Reference | 0.4793 |
|  | Female | 137 | 410 | 33.4 | 721 | 2046 | 35.2 | 0.92 (0.74 - 1.15) |  |
|  | White | 302 | 410 | 73.7 | 1534 | 2050 | 74.8 | Reference | 0.9804 |
|  | Black | 31 | 410 | 7.6 | 142 | 2050 | 6.9 | 1.11 (0.74 - 1.67) |  |
|  | Asian | 9 | 410 | 2.2 | 40 | 2050 | 2.0 | 1.14 (0.55 - 2.38) |  |
|  | Other | 4 | 410 | 1.0 | 22 | 2050 | 1.1 | 0.92 (0.32 - 2.7) |  |
|  | Unknown | 64 | 410 | 15.6 | 312 | 2050 | 15.2 | 1.04 (0.78 - 1.4) |  |
|  | Hispanic Ethnicity | 44 | 360 | 12.2 | 207 | 1824 | 11.3 | 1.09 (0.77 - 1.54) | 0.6348 |
|  | **ASA PS Classification** |  |  |  |  |  |  |  |  |
|  | ASA 1+2 | 0 | 410 | 0.0 | 8 | 2050 | 0.4 | 0 (0 - ∞) | 0.5328 |
|  | ASA 3 | 51 | 410 | 12.4 | 265 | 2050 | 12.9 | Reference |  |
|  | ASA 4 | 351 | 410 | 85.6 | 1747 | 2050 | 85.2 | 1.04 (0.76 - 1.44) |  |
|  | ASA 5 | 8 | 410 | 2.0 | 30 | 2050 | 1.5 | 1.39 (0.6 - 3.2) |  |
|  | **BMI** |  |  |  |  |  |  |  |  |
|  | Mean (SD) | 30.3 |  | 9.1 | 30.18 |  | 7.0 |  | 0.7659 |
|  | <18.5 | 7 | 410 | 1.7 | 34 | 2050 | 1.7 | 1.06 (0.46 - 2.47) |  |
|  | 18.5 - 24.9 | 90 | 410 | 22.0 | 465 | 2050 | 22.7 | Reference |  |
|  | 25 - 29.9 | 125 | 410 | 30.5 | 615 | 2050 | 30.0 | 1.05 (0.78 - 1.41) |  |
|  | 30 - 34.9 | 99 | 410 | 24.1 | 496 | 2050 | 24.2 | 1.03 (0.75 - 1.41) |  |
|  | 35 - 39.9 | 52 | 410 | 12.7 | 248 | 2050 | 12.1 | 1.08 (0.74 - 1.58) |  |
|  | > 40 | 37 | 410 | 9.0 | 192 | 2050 | 9.4 | 1 (0.66 - 1.51) |  |
|  | **Functional Status** |  |  |  |  |  |  |  |  |
|  | No Dyspnea | 168 | 410 | 41.0 | 810 | 2050 | 39.5 | Reference | 0.8148 |
|  | Dyspnea with moderate exertion | 189 | 410 | 46.1 | 980 | 2050 | 47.8 | 0.93 (0.74 - 1.17) |  |
|  | Dyspnea at rest | 53 | 410 | 12.9 | 260 | 2050 | 12.7 | 0.98 (0.7 - 1.38) |  |
|  | Independent in ADLs | 338 | 410 | 82.4 | 1692 | 2050 | 82.5 | Reference | 0.9841 |
|  | Partially Dependent in ADLs | 53 | 410 | 12.9 | 267 | 2050 | 13.0 | 0.99 (0.72 - 1.36) |  |
|  | Totally Dependent in ADLs | 19 | 410 | 4.6 | 91 | 2050 | 4.4 | 1.05 (0.63 - 1.74) |  |
|  | **Co-morbidities** |  |  |  |  |  |  |  |  |
|  | Diabetes | 161 | 410 | 39.3 | 790 | 2050 | 38.5 | 1.03 (0.83 - 1.28) | 0.7812 |
|  | Smoker | 92 | 410 | 22.4 | 354 | 2050 | 17.3 | 1.39 (1.07 - 1.8) | 0.01311 |
|  | Pack-Years (Mean/SD) | 38.05 |  | 28.9 | 37.22 |  | 28.1 | 1 (0.99 - 1.01) | 0.7872 |
|  | Congestive Heart Failure | 140 | 410 | 34.1 | 712 | 2050 | 34.7 | 0.97 (0.78 - 1.22) | 0.8201 |
|  | Previous Cardiac Surgery | 26 | 255 | 10.2 | 111 | 1234 | 9.0 | 1.15 (0.73 - 1.8) | 0.5458 |
|  | Chronic Kidney Disease | 34 | 410 | 8.3 | 178 | 2050 | 8.7 | 0.95 (0.65 - 1.4) | 0.7971 |
|  | Steroid Dependent | 18 | 410 | 4.4 | 75 | 2050 | 3.7 | 1.21 (0.71 - 2.05) | 0.4782 |
|  | Pre-op Transfuison | 17 | 410 | 4.1 | 69 | 2050 | 3.4 | 1.24 (0.72 - 2.13) | 0.4322 |
|  | Operation within last 30 days | 5 | 255 | 2.0 | 35 | 1234 | 2.8 | 0.69 (0.27 - 1.77) | 0.4312 |
|  | **Labs** |  |  |  |  |  |  |  |  |
| Creatinine | Mean / SD | 1.49 |  | 1.4 | 1.53 |  | 1.5 |  | 0.6081 |
| <1.5 | 303 | 410 | 73.9 | 1504 | 2050 | 73.4 | Reference |  |
| >=1.5 | 107 | 410 | 26.1 | 546 | 2050 | 26.6 | 0.97 (0.76 - 1.24) |  |
| Albumin | Mean / SD | 3.5 |  | 0.7 | 3.55 |  | 0.6 |  | 0.17 |
| <3.5 | 178 | 410 | 43.4 | 945 | 2050 | 46.1 | 0.9 (0.72 - 1.11) |  |
| >=3.5 | 232 | 410 | 56.6 | 1105 | 2050 | 53.9 | Reference |  |
| WBC | Mean / SD | 8.51 |  | 3.6 | 8.27 |  | 3.7 |  | 0.2229 |
| >= 4 & <=10 | 299 | 410 | 72.9 | 1524 | 2050 | 74.3 | Reference |  |
| <4 & > 10 | 111 | 410 | 27.1 | 526 | 2050 | 25.7 | 1.08 (0.85 - 1.37) |  |
| Hematocrit | Mean / SD | 36.24 |  | 5.7 | 36.76 |  | 5.7 |  | 0.08939 |
| <40 | 297 | 410 | 72.4 | 1418 | 2050 | 69.2 | 1.17 (0.93 - 1.48) |  |
| >= 40 | 113 | 410 | 27.6 | 632 | 2050 | 30.8 | Reference |  |
| Platelet | Mean / SD | 213.75 |  | 78.5 | 215.64 |  | 77.9 |  | 0.6537 |
| <150 | 77 | 410 | 18.8 | 367 | 2050 | 17.9 | 1.06 (0.81 - 1.39) |  |
| >= 150 | 333 | 410 | 81.2 | 1683 | 2050 | 82.1 | Reference |  |
|  | **Surgical Factors** |  |  |  |  |  |  |  |  |
|  | Emergency | 61 | 410 | 14.9 | 275 | 2050 | 13.4 | 1.13 (0.84 - 1.52) | 0.4309 |
| Wound Classification | Clean | 382 | 410 | 93.2 | 1930 | 2050 | 94.1 | Reference | 0.00014 |
| Clean/Contaminated | 7 | 410 | 1.7 | 79 | 2050 | 3.9 | 0.45 (0.21 - 0.98) |  |
| Contaminated/Dirty-Infected | 21 | 410 | 5.1 | 41 | 2050 | 2.0 | 2.59 (1.51 - 4.43) |  |
| Resident PGY | Mean / SD | 6.62 |  | 2.2 | 6.33 |  | 2.2 | 1.07 (0.94 - 1.2) | 0.3016 |

Legend: ASA PS = American Society of Anesthesiology Physical Status; BMI = body mass index; ADL = Activities of daily living’ WBC = white blood cell’ PGY = post graduate year; SD = standard deviation; OR = odd’s ratio; CI = confidence interval.
